# Supplementary material for: High magnetoresistance of a hexagonal boron nitride–graphene heterostructure-based MTJ through excited-electron transmission
Source: Royal Society of Chemistry journal article supplement (doi:10.1039/d1na00272d), 2021-10-21

## Electronic Supplementary Information

### High magnetoresistance of hexagonal boron nitride- graphene heterostructure-based MTJ through excited-electron transmission

Halimah Harfah,<sup>\*a‡</sup> Yusuf Wicaksono,<sup>a‡</sup> Gagus Ketut Sunnardianto,<sup>c</sup> Muhammad Aziz Majidi,<sup>b</sup> and Koichi Kusakabe<sup>a,d</sup>

*a. Graduate School of Engineering Science, Osaka University, 1-3 Machikaneyama-cho, Toyonaka, Osaka 560-8531, Japan.*

*b. Department of Physics, Faculty of Mathematics and Natural Science, Universitas Indonesia, Kampus UI Depok, Depok, Jawa Barat 16424, Indonesia.*

*c. Research Center for Physics, The National Research and Innovation Agency, Kawasan Puspiptek Serpong, Tangerang Selatan, 15314, Banten, Indonesia.*

*d. School of Science, Graduate School of Science, University of Hyogo, 3-2-1 Kouto, Kamigori-cho, Ako-gun, Hyogo, 678-1297, Japan.*

<sup>‡</sup> These authors contributed equally to this work

---

\* Corresponding author; E-mail: harfah.h@opt.mp.es.osaka-u.ac.jp

**Table S1.** The comparison between various van der Waals interactions method in DFT calculation on Ni/3hBN/Ni MTJ respect to experimental result on epitaxial hBN placed on Ni(111) surface [1] and bulk hBN [2]. DFT-D3 and DFT-D2 show an interlayer distance between Ni-hBN and hBN-hBN closer to experimental values.

|                | Ni-hBN Layer Distance           | hBN-hBN layer Distance         |
|----------------|---------------------------------|--------------------------------|
| Experimental   | $1.87 \pm 0.12 \text{ \AA}$ [1] | $3.33 \text{ \AA}$ [2]         |
| DFT-D2 method  | $2.07 \text{ \AA}$ (N-Ni)       | $3.44 \text{ \AA}$ (N-B)       |
|                | $1.95 \text{ \AA}$ (B-Ni)       | $3.56 \text{ \AA}$ (B-N)       |
| DFT-D3 method  | $2.05 \text{ \AA}$ (N-Ni)       | $3.13 \text{ \AA}$ (N-B)       |
|                | $1.93 \text{ \AA}$ (B-Ni)       | $3.25 \text{ \AA}$ (B-N)       |
| vdW-DF method  | $3.52 \text{ \AA}$ (N-Ni)       | $3.53 \text{ \AA}$ (N-B & B-N) |
|                | $3.52 \text{ \AA}$ (B-Ni)       |                                |
| vdW-DF2 method | $3.56 \text{ \AA}$ (N-Ni)       | $3.48 \text{ \AA}$ (N-B & B-N) |
|                | $3.56 \text{ \AA}$ (B-Ni)       |                                |

[1] Tonkikh, A. A. et. al., Structural and electronic properties of epitaxial multilayer h-BN on Ni(111) for spintronics applications. *Sci. Rep.* **6**, 23547 (2016).

[2] Lynch, R. W. Effect of high pressure on the lattice parameters of diamond, graphite, and hexagonal boron nitride. *J. Chem. Phys.* **44**, 181 (1966).

**Figure S1.** The transmission probability of Ni/3hBN/Ni and Ni/hBN-vacuum-hBN/Ni in PC state for spin-up and spin-down electrons. The hBN at the interfaces distance of Ni/hBN-vacuum-hBN/Ni MTJ was made same with Ni/3hBN/Ni MTJ. This result shows that the wide-gap insulator of hBN can never be treated as a vacuum for the conducting electron. This result also indicates that the high transmission probability peak of the spin-down electron in the PC state found in the 3hBN, 4hBN, and 5hBN system comes from the proximity effect, which works on middle hBN.

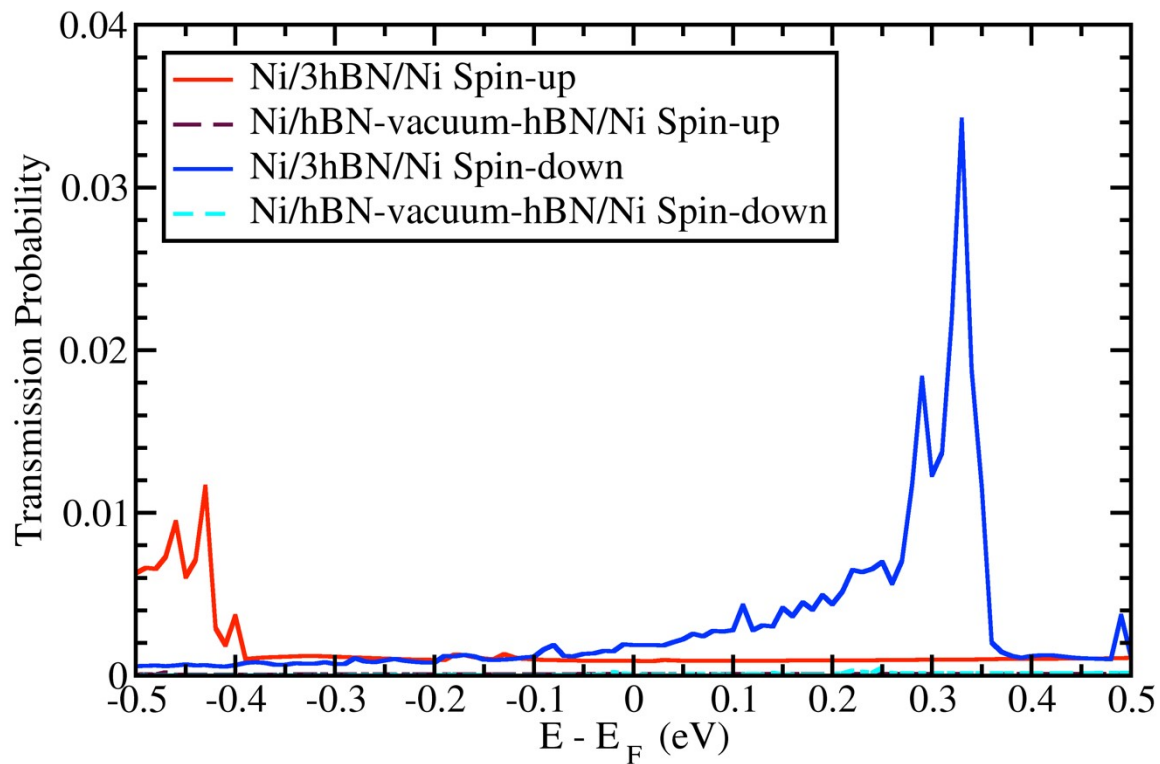

**Figure S2.** The local density of states (LDOS) of insulator barrier of (a) Ni/3hBN/Ni and (b) Ni4hBNNi (only middle hBN shows in the graph) when upper and lower Ni slabs in anti-parallel configuration (APC).

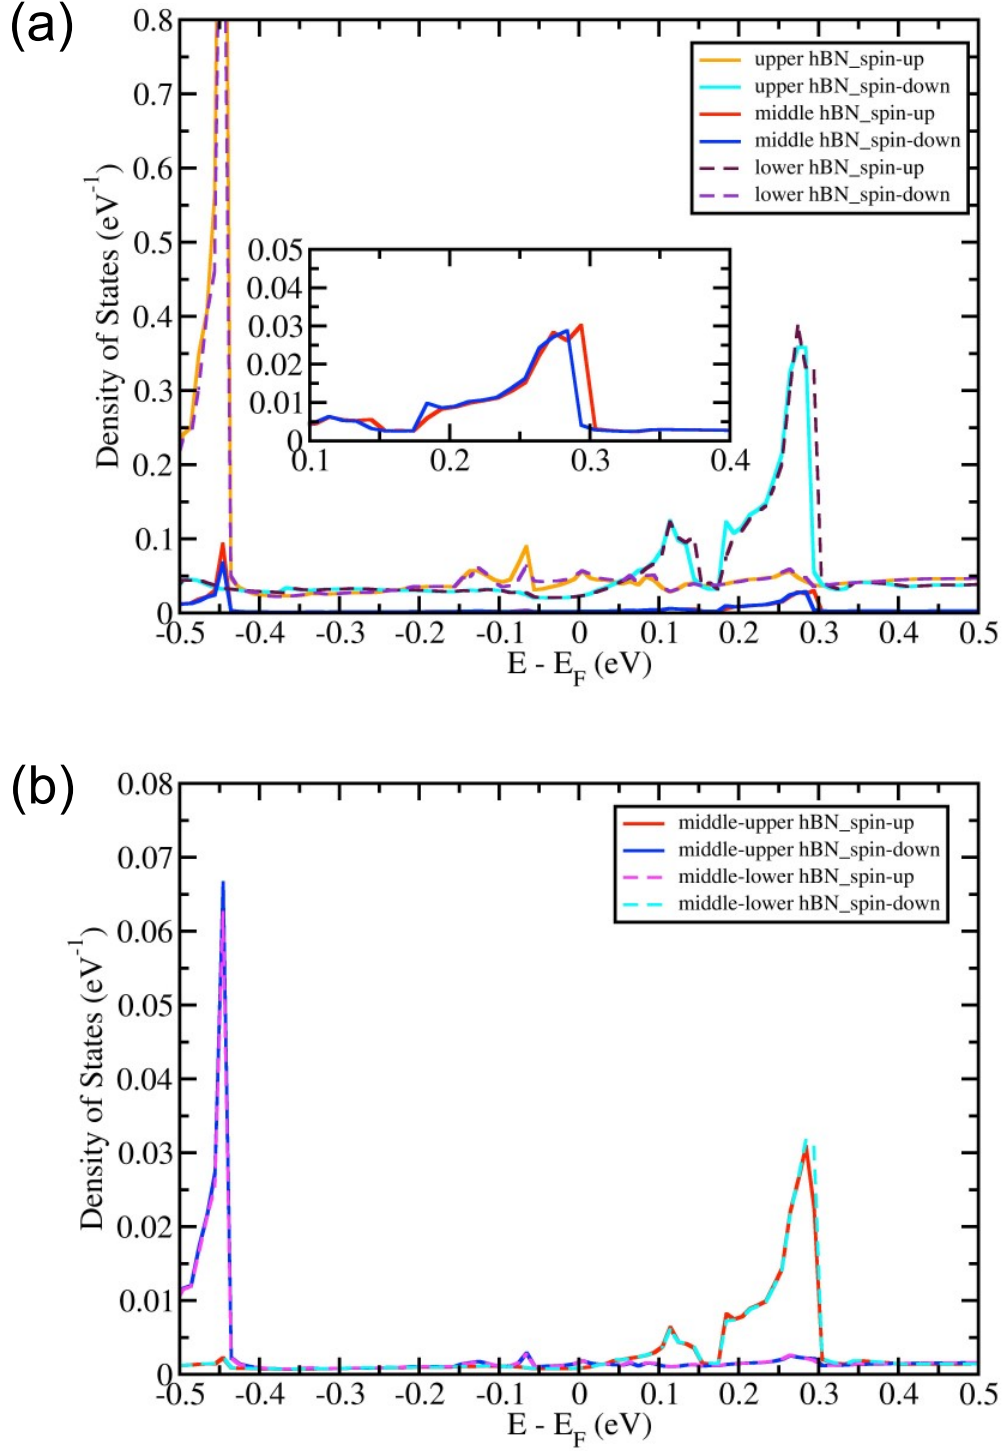

Supplement: d1na00272d1.pdf [file d1na00272d1.pdf]
